# Supplementary material
Source: PubMed Central journal article supplement (PMC2675739)

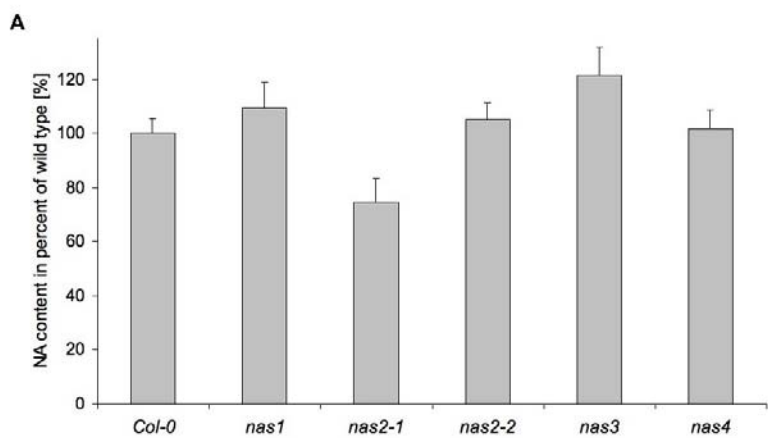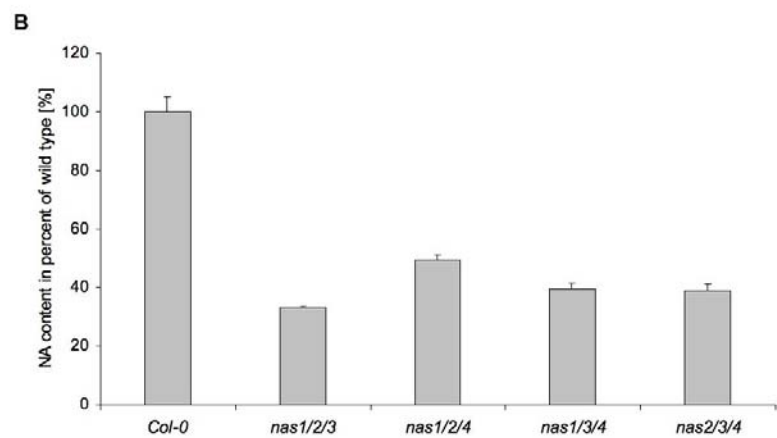

Supplement: pp.109.136374_1.pdf [file pp.109.136374_1.pdf]

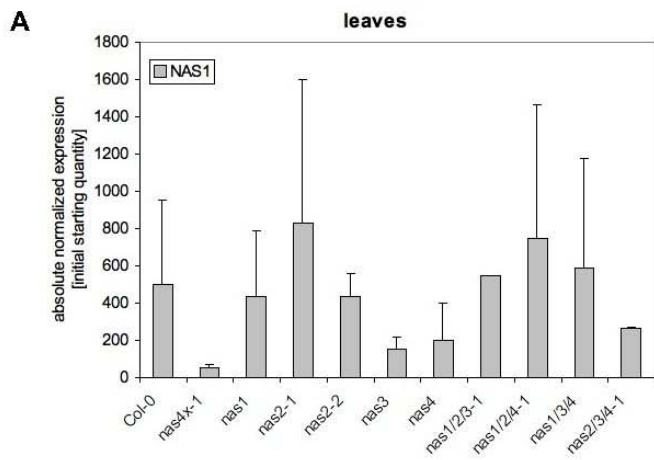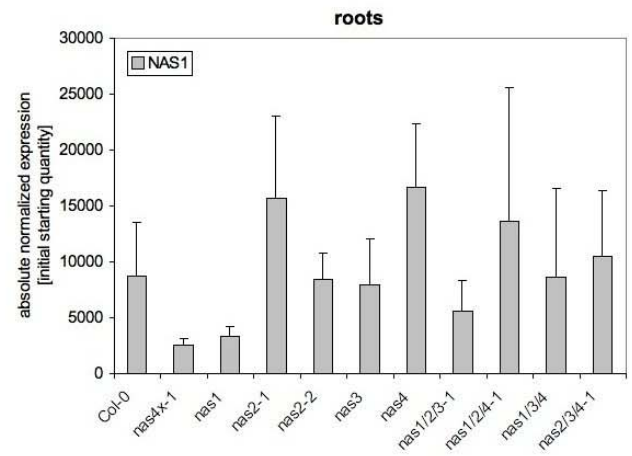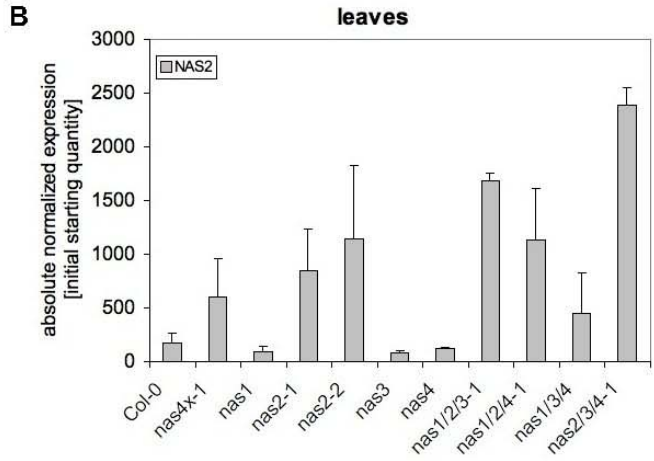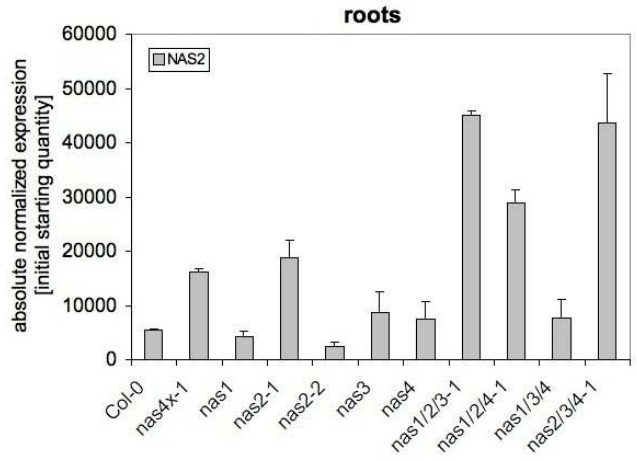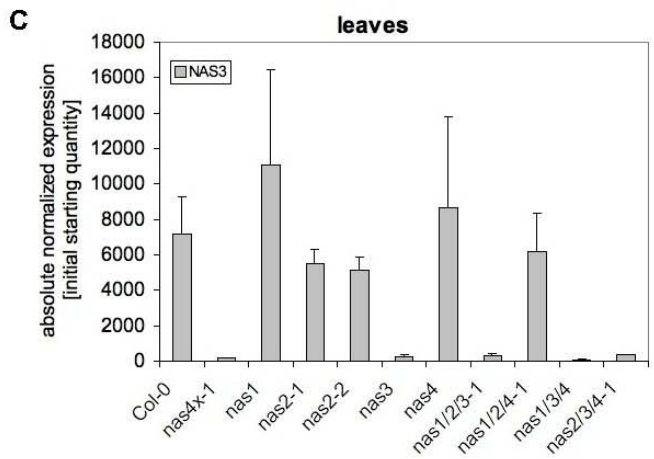

n.d

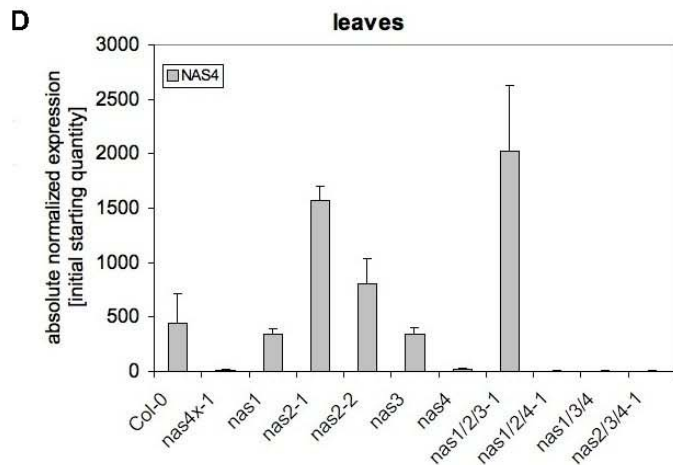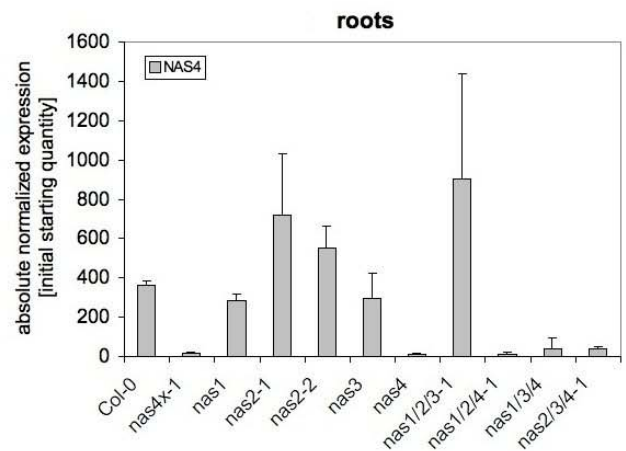

Supplement: pp.109.136374_2.pdf [file pp.109.136374_2.pdf]

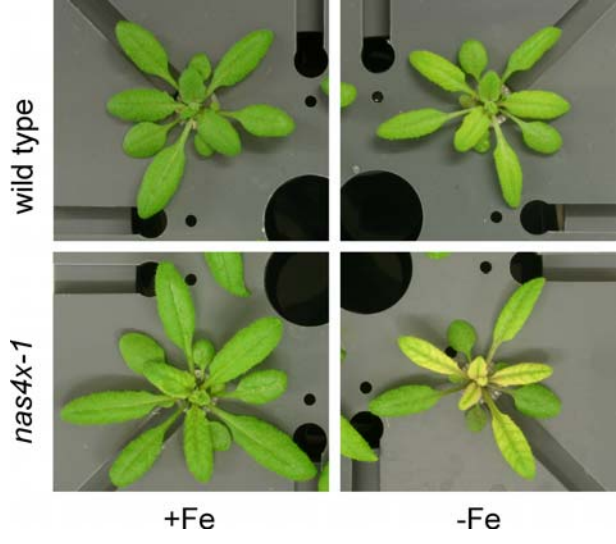

Supplement: pp.109.136374_4.pdf [file pp.109.136374_4.pdf]

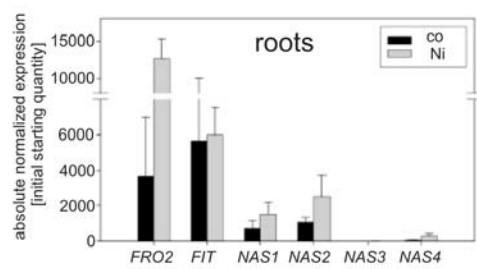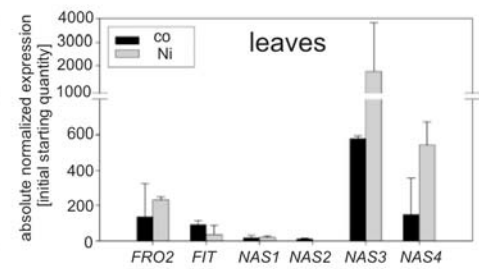

Supplement: pp.109.136374_6.pdf [file pp.109.136374_6.pdf]

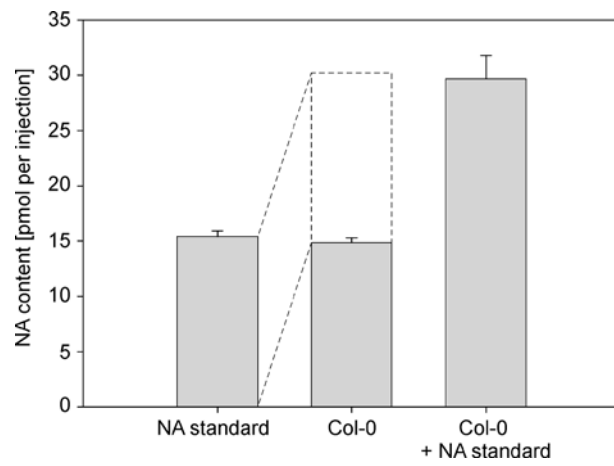

Supplement: pp.109.136374_7.pdf [file pp.109.136374_7.pdf]
